# Supplementary material for: Substituent effect on the photophysical properties, electrochemical properties and electroluminescence performance of orange-emitting iridium complexes
Source: Royal Society of Chemistry journal article supplement (doi:10.1039/c2dt12206e), 2012-01-01
Supplement: c2dt12206e.pdf [file c2dt12206e.pdf]

## Supporting Information

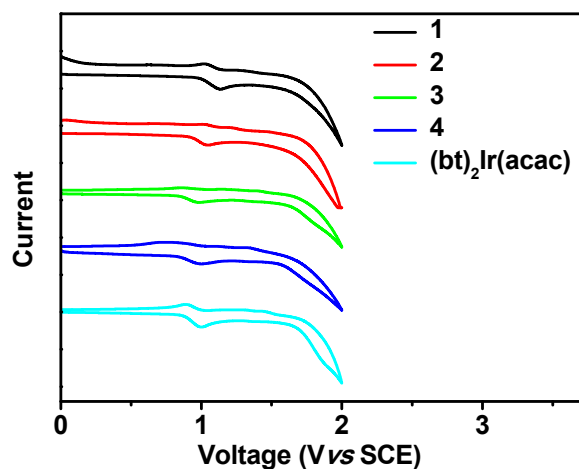

**Figure S1.** Cyclic voltammograms of the complexes.

**Table S1:** Crystallographic data for iridium complex 1.

|                               |                              |
|-------------------------------|------------------------------|
| <b>Formula</b>                | $C_{33}H_{25}F_6IrN_2O_4S_2$ |
| Formula weight $M_r$          | 883.87                       |
| Space group                   | <i>Iba</i> 2                 |
| <b>Crystal system</b>         | Orthorhombic                 |
| $T$ (K)                       | 293(2)                       |
| $\lambda$ (Å)                 | 0.71073                      |
| $a$ (Å)                       | 11.985(6)                    |
| $b$ (Å)                       | 16.493(8)                    |
| $c$ (Å)                       | 17.398(3)                    |
| $\alpha$ (°)                  | 90.00°                       |
| $V$ (Å <sup>3</sup> )         | 3439(3)                      |
| $Z$                           | 4                            |
| $\rho_c$ (g/cm <sup>3</sup> ) | 1.707                        |
| Flack parameter               | 0.015(2)                     |
| $F(000)$                      | 1728                         |
| $\mu$ (cm <sup>-1</sup> )     | 4.075                        |
| no. colled reflens            | 7779                         |
| no. unique reflens            | 2940                         |
| $\theta$ (°)                  | 2.10–24.99                   |
| $R_{int}$                     | 0.0292                       |
| $R_I$                         | 0.0343                       |
| w $R_2$                       | 0.0940                       |
| GOF                           | 1.054                        |
